# Supplementary material for: Histone acetylations mark origins of polycistronic transcription in Leishmania major
Source: PubMed Central journal article supplement (PMC2679053; doi:10.1186/1471-2164-10-152), 2009-04-08
Supplement: 1471-2164-10-152-S2.pdf [file 1471-2164-10-152-S2.pdf]

| chr | location | H3Ac peak(s)    | TBP/SNAP  | name  | Type | strand | genes | Comments                                              |
|-----|----------|-----------------|-----------|-------|------|--------|-------|-------------------------------------------------------|
| 1   | 74-78K   | 76049           | 78K       | 1.1L  | D    | B      | 31    |                                                       |
| 1   | 78-84K   | 79789           | 78K       | 1.1R  | D    | T      | 53    |                                                       |
| 1   | 266-268K | 267451          |           | 1.2?  |      |        |       | repetitive_262-269K_LST_repeats                       |
| 2   | 3-9K     | 4057            |           | 2.1?  |      |        |       | repetitive_H2/SCG_repeat                              |
| 2   | 260-265K | 262492          | 264-266K  | 2.2   | D    | B      | 58    | 5'_to_SL_array                                        |
| 2   | 297-302K | 298848          | 297-298K  | 2.3   | R    | T      | 17    | 3'_to_SL_array                                        |
| 3   | 0-5K     | 3744            | 5K        | 3.1L  | D    | B      | 1     |                                                       |
| 3   | 5-10K    | 7168            | 5K        | 3.1R  | D    | T      | 64    |                                                       |
| 3   | 252-257K | 254686          | 247-252K  | 3.2   | I    | T      | 1     |                                                       |
| 3   | 378-383K | 380468 & 382084 | 383-384K  | 3.3   | T    | B      | 30    |                                                       |
| 4   | 0-6K     | 3080            | 1K        | 4.1   | T    | T      | 40    |                                                       |
| 4   | 261-266K | 262884          | 266K      | 4.2   | I    | B      | 26    |                                                       |
| 4   | 467-472K | 469916          | 473K      | 4.3   | T    | B      | 60    |                                                       |
| 5   | 1-10K    | 5097            | 4K        | 5.1   | T    | T      | 44    |                                                       |
| 5   | 146-152K | 148379          | 146-148K  | 5.2   | I    | T      | 52    |                                                       |
| 5   | 380-385K | 382134          | ?         | 5.3L  | D    | B      | 8     |                                                       |
| 5   | 385-390K | 386554          | ?         | 5.3R  | D    | T      | 8     |                                                       |
| 5   | 435-440K | 438354          | 440K      | 5.4L  | D    | B      | 9     |                                                       |
| 5   | 440-446K | 443456          | 440K      | 5.4R  | D    | T      | 2     | 5'_to_snoRNAs                                         |
| 6   | 117-123K | 121299          | 123-125K  | 6.1L  | D    | B      | 36    |                                                       |
| 6   | 127-133K | 130230          | 125K-127K | 6.1R  | D    | T      | 19    |                                                       |
| 6   | 195-201K | 198062          | ?         | 6.2   | I    | T      | 76    |                                                       |
| 6   | 500-504K | 502529          | 504K      | 6.3L  | D    | B      | 4     |                                                       |
| 6   | 504-508K | 508564          | 504K      | 6.3R  | D    | T      | 1     | repeats_at_right                                      |
| 7   | 5-10K    | 8460            | 10K       | 7.1L  | D    | B      | 1     |                                                       |
| 7   | 10-15K   | 12006           | 10K       | 7.1R  | D    | B      | 15    |                                                       |
| 7   | 205-210K | 207365          | 210K      | 7.2L  | D    | B      | 33    |                                                       |
| 7   | 214-219K | 215867          | 214K      | 7.2R  | D    | T      | 37    |                                                       |
| 7   | 382-387K | 382778 & 384624 | 384K      | 7.3.1 | R    | T      | 40    | 3'_to_tRNA                                            |
| 7   | 590-595K | 591281          |           | 7.4?  |      |        |       | repetitive_H2/SCG_repeat                              |
| 8   | 1-6K     | 2625            | 1K        | 8.1   | T    | T      | 89    |                                                       |
| 8   | 481-489K | 485059          | 488-492K  | 8.2L  | D    | B      | 23    |                                                       |
| 8   | 491-497K | 493764          | 488-492K  | 8.2R  | D    | T      | 23    |                                                       |
| 9   | 2-7K     | 2977 & 4847     | 0-2K      | 9.1   | T    | T      | 82    |                                                       |
| 9   | 400-406K | 403532          | 406K      | 9.2L  | D    | B      | 31    | 3'_to_tRNA_cluster_at_405.5K                          |
| 9   | 406-411K | 408207          | 406K      | 9.2R  | D    | T      | 1     | 5'_to_tRNA_cluster_at_419K                            |
| 9   | 567-572K | 569840          | 572K      | 9.3   | T    | B      | 54    |                                                       |
| 10  | 14-19K   | 18300           | 19K       | 10.1L | D    | B      | 3     |                                                       |
| 10  | 19-24K   | 21530           | 19K       | 10.1R | D    | T      | 54    |                                                       |
| 10  | 291-297K | 293819          | 297K      | 10.2  | I    | B      | 9     |                                                       |
| 10  | 528-534K | 530993          | 534K      | 10.3L | D    | B      | 66    | 5'_to_tRNA_cluster_at_534K                            |
| 10  | 534-539K | 535243          | 534K      | 10.3R | D    | T      | 10    | 3'_to_tRNA_cluster_at_534K                            |
| 11  | 1-6K     | 3161            | 0-1K      | 11.1  | T    | T      | 47    |                                                       |
| 11  | 164-169K | 165722          | 157-163K  | 11.2  | R    | T      | 51    | 3'_to_tRNA_clusters_at_157K_and_163K                  |
| 11  | 382-387K | 384362          | 382K      | 11.3  | R    | T      | 44    | 3'_to_tRNA_at_382K                                    |
| 12  | 378-385K | 382820          | 385/387K  | 12.1L | D    | B      | 86    |                                                       |
| 12  | 390-395K | 392935          | 390K      | 12.1R | D    | T      | 12    |                                                       |
| 12  | 667-675K | 673076          | 675K      | 12.2  | T    | B      | 41    |                                                       |
| 13  | 137-145K | 141069          | 144K      | 13.1L | D    | B      | 45    |                                                       |
| 13  | 149-154K | 148915          | 147K      | 13.1R | D    | T      | 25    |                                                       |
| 13  | 482-487K | 484887          | 486K      | 13.2  | I    | B      | 68    |                                                       |
| 13  | 639-647K | 643198          | 645K      | 13.3L | D    | B      | 31    |                                                       |
| 13  | 643-650K | 646088          | 645K      | 13.3R | D    | T      | 2     |                                                       |
| 14  | 0-9K     | 4240            | 2K        | 14.1  | T    | T      | 48    |                                                       |
| 14  | 420-427K | 423490          | ?         | 14.2L | D    | B      | 61    |                                                       |
| 14  | 427-433K | 429015          | ?         | 14.2R | D    | T      | 46    |                                                       |
| 15  | 83-89K   | 86814           | 87K       | 15.1L | D    | B      | 25    |                                                       |
| 15  | 87-94K   | 90129           | 87K       | 15.1R | D    | T      | 49    | snoRNAs_at_160K_tRNA_cluster_at_323K                  |
| 15  | 618-625K | 622156          | 623K      | 15.2L | D    | B      | 94    |                                                       |
| 15  | 624-629K | 626151          | 623K      | 15.2R | D    | T      | 1     |                                                       |
| 16  | 334-341K | 337001          | 340-344K  | 16.1L | D    | B      | 95    |                                                       |
| 16  | 344-349K | 346143          | 340-344K  | 16.1R | D    | T      | 24    |                                                       |
| 16  | 644-650K | 647167          | 649K      | 16.2L | D    | B      | 41    |                                                       |
| 16  | 647-653K | 649571          | 649K      | 16.2R | D    | T      | 14    |                                                       |
| 17  | 162-167K | 165084          | 167K      | 17.1  | I    | B      | 40    |                                                       |
| 17  | 335-342K | 338136          | 342K      | 17.2  | R    | B      | 36    | 5'_to_tRNA_cluster_at_345K                            |
| 17  | 410-416K | 413305          | 416K      | 17.3L | D    | B      | 20    |                                                       |
| 17  | 415-422K | 417130          | 416K      | 17.3R | D    | T      | 62    |                                                       |
| 18  | 225-231K | 228189          | 231K      | 18.1L | D    | B      | 56    | snoRNAs_at_180K                                       |
| 18  | 231-236K | 231504          | 231K      | 18.1R | D    | T      | 49    |                                                       |
| 18  | 449-455K | 451405          | 449K      | 18.2  | T    | T      | 66    |                                                       |
| 19  | 65-72K   | 68867           | ?         | 19.1L | D    | B      | 22    |                                                       |
| 19  | 65-72K   | 69632           | ?         | 19.1R | D    | T      | 47    |                                                       |
| 19  | 304-307K | 305179          | ?         | 19.2  | I    | T      | 84    |                                                       |
| 19  | 632-643K | 635407 & 638977 | 637K      | 19.3  | I    | T      | 26    | possible_genome_annotation_problem                    |
| 20  | 94-99K   | 96449           | 99K       | 20.1L | D    | B      | 26    |                                                       |
| 20  | 99-104K  | 102144          | 99K       | 20.1R | D    | T      | 54    | snoRNAs_at_320-340K                                   |
| 20  | 349-354K | 350579          | 348K      | 20.2  | I    | T      | 35    |                                                       |
| 20  | 527-533K | 528764 & 530100 | 526K      | 20.3  | I    | T      | 31    | peak_split_at_529K                                    |
| 20  | 735-742K | 738382          | 741K      | 20.4  | T    | B      | 30    |                                                       |
| 21  | 3-8K     | 4560            | 10K       | 21.1L | D    | B      | 1     |                                                       |
| 21  | 8-15K    | 11955           | 10K       | 21.1R | D    | T      | 54    | tRNA_cluster_at_160K                                  |
| 21  | 214-219K | 218477          | 220-224K  | 21.2L | D    | B      | 20    |                                                       |
| 21  | 223-230K | 225872          | 220-224K  | 21.2R | D    | T      | 56    | 443K                                                  |
| 21  | 720-726K | 724750          | 726K      | 21.3L | D    | B      | 77    |                                                       |
| 21  | 725-731K | 728490          | 726K      | 21.3R | D    | T      | 17    |                                                       |
| 22  | 5-11K    | 7610            | 10K       | 22.1  | I    | B      | 1     |                                                       |
| 22  | 316-324K | 321526          | 323K      | 22.2L | D    | B      | 76    |                                                       |
| 22  | 324-329K | 324841          | 323K      | 22.2R | D    | T      | 43    |                                                       |
| 22  | 602-607K | 605340          | 607-610K  | 22.3L | D    | B      | 26    | snoRNAs_at_587K                                       |
| 22  | 611-616K | 612413          | 607-610K  | 22.3R | D    | T      | 21    |                                                       |
| 23  | 2-9K     | 3010            | 2K        | 23.1  | T    | T      | 60    | snoRNAs_at_40K                                        |
| 23  | 215-221K | 218147          | 215K      | 23.2  | R    | T      | 4     | 5'_to_tRNA_cluster_225-227K                           |
| 23  | 545-551K | 548719          | 551K      | 23.3L | D    | B      | 73    |                                                       |
| 23  | 554-559K | 555308          | 554K      | 23.3R | D    | T      | 60    |                                                       |
| 24  | 0-8K     | 4976            | 3K?       | 24.1  | T    | T      | 63    |                                                       |
| 24  | 230-236K | 232482          | 230K      | 24.2  | I    | T      | 57    |                                                       |
| 24  | 469-476K | 471731          | 469K      | 24.3  | I    | T      | 35    | tRNA_cluster_at_623K                                  |
| 24  | 713-718K | 715556          | 717K      | 24.4  | I    | B      | 28    | snoRNA_at_682K                                        |
| 24  | 830-836K | 833036          | 836K      | 24.5L | D    | B      | 70    |                                                       |
| 24  | 835-841K | 837350          | 836K      | 24.5R | D    | T      | 1     |                                                       |
| 25  | 263-269K | 266266          | 268K      | 25.1L | D    | B      | 73    |                                                       |
| 25  | 267-273K | 269132          | 268K      | 25.1R | D    | T      | 38    |                                                       |
| 25  | 582-588K | 585178          | 588K      | 25.2  | I    | B      | 40    | snoRNAs_at_623-632K                                   |
| 25  | 823-828K | 824331          | 827K      | 25.3L | D    | B      | 78    |                                                       |
| 25  | 827-833K | 828666          | 827K      | 25.3R | D    | T      | 30    |                                                       |
| 25  | 903-913K | 907131          |           | 25.4? |      |        |       | repetitive                                            |
| 26  | 224-230K | 228362          | 230K      | 26.1  | I    | B      | 76    |                                                       |
| 26  | 303-310K | 306910          | 309K      | 26.2L | D    | B      | 24    |                                                       |
| 26  | 308-313K | 310990          | 309K      | 26.2R | D    | T      | 55    |                                                       |
| 26  | 575-580K | 576440          | 575K      | 26.3  | I    | T      | 11    |                                                       |
| 26  | 610-620  | 610080-620328   | 608K      | 26.4  | I    | T      | 62    | repetitive_FAD_genes_at_610-620K, snoRNAs_at_648-677K |
| 26  | 919-924K | 920327          | 919K      | 26.5  | I    | T      | 45    |                                                       |
| 27  | 69-73K   | 71699           | 73K       | 27.1L | D    | B      | 29    |                                                       |

|    |            |                   |            |       |   |   |     |                                                                                           |
|----|------------|-------------------|------------|-------|---|---|-----|-------------------------------------------------------------------------------------------|
| 27 | 73-79K     | 74481             | 73K        | 27.1R | D | T | 63  | snoRNAs_at_370K                                                                           |
| 27 | 526-534K   | 530485            | 534K       | 27.2L | D | B | 37  | snoRNAs_at_375-385K                                                                       |
| 27 | 534-540K   | 534225            | 534K       | 27.2R | D | T | 48  |                                                                                           |
| 27 | 978-984K   | 981145            | 984K       | 27.3  | D | B | 65  | 5'_to_rRNA_gene_array                                                                     |
| 27 | 1062-1066K | 1063782           | 1062K      | 27.4  | R | T | 25  | 3'_to_rRNA_gene_array                                                                     |
| 28 | 0-8K       | 3830              | 3K         | 28.1  | T | T | 35  |                                                                                           |
| 28 | 275-282K   | 279142            | 282K       | 28.2L | D | B | 44  |                                                                                           |
| 28 | 281-286K   | 283222            | 282K       | 28.2R | D | T | 85  |                                                                                           |
| 28 | 815-822K   | 819429            | 822K       | 28.3L | D | B | 53  |                                                                                           |
| 28 | 823-829K   | 825897            | 823K       | 28.3R | D | T | 63  |                                                                                           |
| 28 | 1153-1158K | 1155774           | 1158K      | 28.4  | I | B | 34  |                                                                                           |
| 29 | 335-341K   | 338616            | 341K       | 29.1L | D | B | 92  |                                                                                           |
| 29 | 344-350K   | 345586            | 344K       | 29.1R | D | T | 57  |                                                                                           |
| 29 | 813-820K   | 816267            | 820K       | 29.2  | R | B | 41  | 3'_to_tRNA_cluster_at_820K                                                                |
| 29 | 1025-1033K | 1031210           | 1033K      | 29.3L | D | B | 52  |                                                                                           |
| 29 | 1033-1037K | 1035035           | 1033K      | 29.3R | D | T | 43  |                                                                                           |
| 30 | 221-229K   | 226815            | 229K       | 30.1L | D | B | 73  | snoRNAs_at_145K                                                                           |
| 30 | 231-239K   | 234048            | 231K       | 30.1R | D | T | 121 | snoRNAs_564K                                                                              |
| 30 | 644-649K   | 644142            | 644K       | 30.2  | I | T | 35  |                                                                                           |
| 30 | 1090-1099K | 1093737 & 1095413 | ?          | 30.3  | I | B | 80  | peak_split_at_1094K                                                                       |
| 30 | 1231-1237K | 1234347           | 1237K      | 30.4L | D | B | 42  | peaks_do_not_correspond_exactly_to_strand_switch_region, likely_genome_annotation_problem |
| 30 | 1237-1243K | 1237832           | 1237K      | 30.4R | D | T | 52  | peaks_do_not_correspond_exactly_to_strand_switch_region, likely_genome_annotation_problem |
| 31 | 197-204K   | 201084            | 204K       | 31.1  | R | B | 62  | 3'_to_tRNA_cluster_at_204K                                                                |
| 31 | 490-494K   | 492195 & 493640   | 494K       | 31.2  | R | B | 66  | 3'_to_tRNA_cluster_at_495K                                                                |
| 31 | 773-779K   | 774370 & 777005   | 779K       | 31.3  | I | B | 43  |                                                                                           |
| 31 | 971-976K   | 974913            | 976K       | 31.4  | I | B | 35  |                                                                                           |
| 31 | 1308-1315K | 1313683           | 1316K      | 31.5  | R | B | 75  | 3'_to_tRNA_cluster_at_1316K                                                               |
| 31 | 1469-1473K | 1471370           | 1473K      | 31.6L | D | B | 50  |                                                                                           |
| 31 | 1473-1477K | 1474600           | 1437K      | 31.6R | D | T | 3   |                                                                                           |
| 32 | 180-185K   | 182930            | 185K       | 32.1L | D | B | 50  |                                                                                           |
| 32 | 185-191K   | 187435            | 185K       | 32.1R | D | T | 93  |                                                                                           |
| 32 | 835-841K   | 839005            | 841K       | 32.2  | I | B | 84  |                                                                                           |
| 32 | 1163-1166K | 1166362           | 1166-1173K | 32.3L | D | B | 85  |                                                                                           |
| 32 | 1173-1177K | 1173772           | 1166-1173K | 32.3R | D | T | 104 |                                                                                           |
| 33 | 103-107K   | 104718            | 107K       | 33.1  | R | B | 31  | 3'_to_tRNA_cluster_at_107K, snoRNAs_at_103K&90-93K                                        |
| 33 | 259-265K   | 263123            | 265K       | 33.2L | D | B | 46  |                                                                                           |
| 33 | 265-271K   | 267288            | 265K       | 33.2R | D | T | 95  | snoRNAs_at_308K                                                                           |
| 33 | 601-609K   | 603759            | 601K       | 33.3  | R | T | 30  | 5'_to_tRNA_at_601K                                                                        |
| 33 | 765-772K   | 767671            | 763-765K   | 33.4  | I | T | 14  | snoRNAs_at_676K                                                                           |
| 33 | 812-817K   | 815842            | 817K       | 33.5L | D | B | 4   |                                                                                           |
| 33 | 817-824K   | 819412            | 817K       | 33.5R | D | T | 112 |                                                                                           |
| 33 | 1336-1342K | 1337571           | ?          | 33.6  | I | T | 39  |                                                                                           |
| 34 | 0-7K       | 5710              | 7K         | 34.1L | D | B | 1   |                                                                                           |
| 34 | 7-13K      | 9450              | 7K         | 34.1R | D | T | 70  |                                                                                           |
| 34 | 317-322K   | 321507            | 322K       | 34.2L | D | B | 2   |                                                                                           |
| 34 | 322-329K   | 324203            | 322K       | 34.2R | D | T | 39  |                                                                                           |
| 34 | 556-563K   | 559566            | 563K       | 34.3  | I | B | 20  |                                                                                           |
| 34 | 1150-1155K | 1153249           | 1155K      | 34.4L | D | B | 136 |                                                                                           |
| 34 | 1155-1163K | 1156989           | 1155K      | 34.4R | D | T | 100 |                                                                                           |
| 34 | 1535-1540K | 1537421           | 1535K      | 34.5  | R | T | 112 | 3'_to_tRNA_cluster_at_1535K                                                               |
| 35 | 39-47K     | 41505 & 45500     | 47K        | 35.1L | D | B | 19  |                                                                                           |
| 35 | 47-52K     | 48815             | 47K        | 35.1R | D | T | 66  |                                                                                           |
| 35 | 396-403K   | 398829            | 396K       | 35.2  | I | T | 32  |                                                                                           |
| 35 | 550-556K   | 552386            | 550K       | 35.3  | I | T | 27  |                                                                                           |
| 35 | 731-738K   | 735069            | 738K       | 35.4L | D | B | 26  |                                                                                           |
| 35 | 738-741K   | 738615            | 738K       | 35.4R | D | T | 40  |                                                                                           |
| 35 | 875-880K   | 876763            | 875K       | 35.5  | I | T | 44  |                                                                                           |
| 35 | 1399-1405K | 1402117           | 1405K      | 35.6  | I | B | 88  | snoRNAs_at_1261-1265K&1331K                                                               |
| 35 | 1537-1543K | 1540881           | 1543K      | 35.7L | D | B | 43  |                                                                                           |
| 35 | 1543-1549K | 1545192           | 1543K      | 35.7R | D | T | 79  | snoRNAs_at_1671-1681K                                                                     |
| 35 | 1853-1860K | 1854996           | 1853K      | 35.8  | I | T | 66  |                                                                                           |
| 35 | 2067-2073K | 2069321           | 2067K      | 35.9  | I | T | 1   |                                                                                           |
| 36 | 149-155K   | 153406            | 155K       | 36.1L | D | B | 55  |                                                                                           |
| 36 | 155-161K   | 156721            | 155K       | 36.1R | D | T | 83  |                                                                                           |
| 36 | 774-780K   | 777021            | 780K       | 36.2L | D | B | 63  |                                                                                           |
| 36 | 779-785K   | 780676            | 780K       | 36.2R | D | T | 63  | snoRNAs_at_940-943K                                                                       |
| 36 | 1103-1110K | 1110172           | 1110-1116K | 36.3  | I | B | 17  | snoRNAs_at_1078-1079K                                                                     |
| 36 | 1232-1239K | 1236710           | 1239K      | 36.4  | I | B | 37  |                                                                                           |
| 36 | 1408-1413K | 1412509           | 1413K      | 36.5L | D | B | 64  |                                                                                           |
| 36 | 1413-1419K | 1415314           | 1413K      | 36.5R | D | T | 58  | snoRNAs_at_1555K                                                                          |
| 36 | 1608-1615K | 1611446           | 1608K      | 36.6  | R | T | 66  | 5'_to_tRNA_at_1608K                                                                       |
| 36 | 2075-2081K | 2077650           | 2081K      | 36.7  | I | B | 50  |                                                                                           |
| 36 | 2462-2469K | 2466929           | 2469K      | 36.8  | R | B | 102 | 3'_to_tRNA_cluster_at_2469K                                                               |
| 36 | 2672-2679K | 2677083 & 2678698 | 2679K      | 36.9  | T | B | 76  |                                                                                           |

**D** 114  
**C** 0  
**T** 16  
**R** 16  
**I** 38  
**total** 184  
**repeats** 4
